# Supplementary material
Source: PubMed Central journal article supplement (PMC4926986)
Supplement: ASN.2015070796_ASN2015070796SupplementaryData.pdf [file ASN.2015070796_ASN2015070796SupplementaryData.pdf]

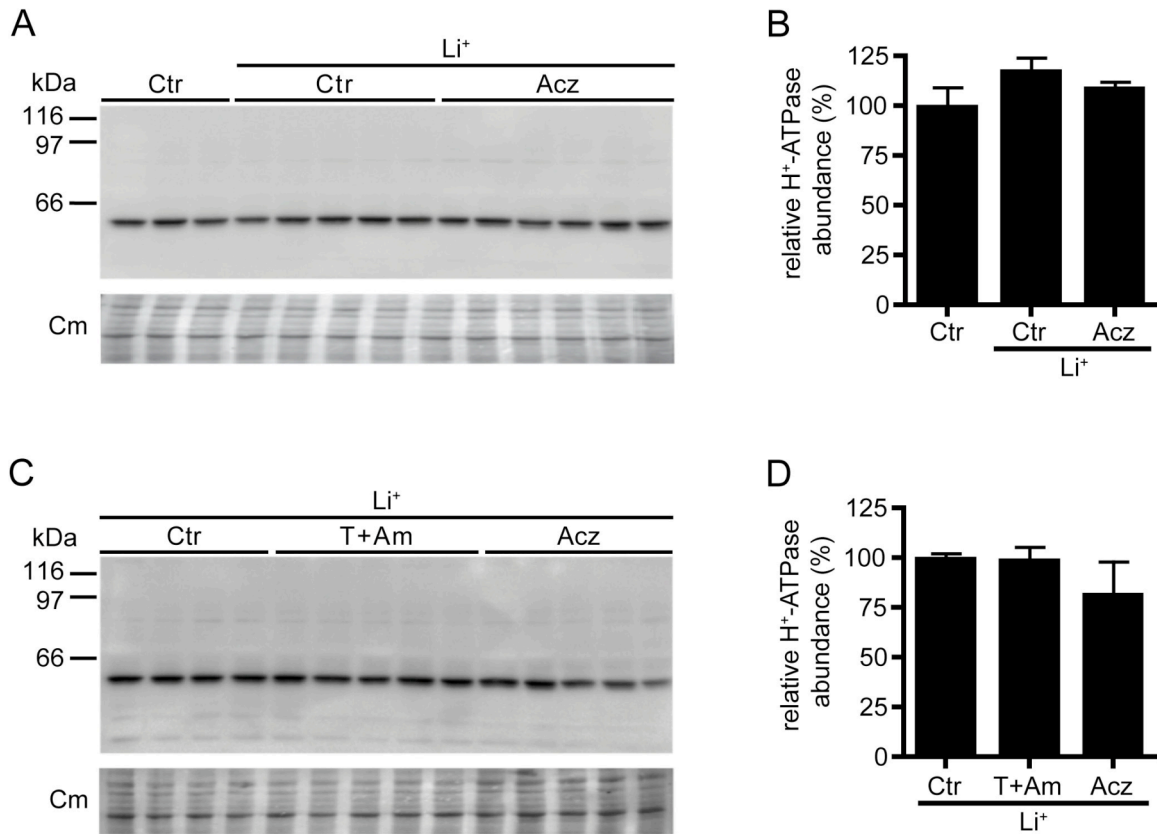

**Supplementary figure 1. Effect thiazide/amiloride and H<sup>+</sup>-ATPase abundance in lithium-NDI mice. (A-D)** Immunoblot and corresponding densitometric analysis of H<sup>+</sup>-ATPase abundance of mice that are untreated (Ctr), treated with lithium only (Li<sup>+</sup>) or with lithium together with acetazolamide (Acz) or thiazide/amiloride (T+Am). The signals for H<sup>+</sup>-ATPase were densitometrically quantified (**B** and **D**). Mean values +/- SEM of normalized H<sup>+</sup>-ATPase abundance is given relative to control. Asterisks indicate significant differences (p<0.05) from controls. Equal loading of the samples was confirmed by staining of the blots with coomassie blue (Cm).

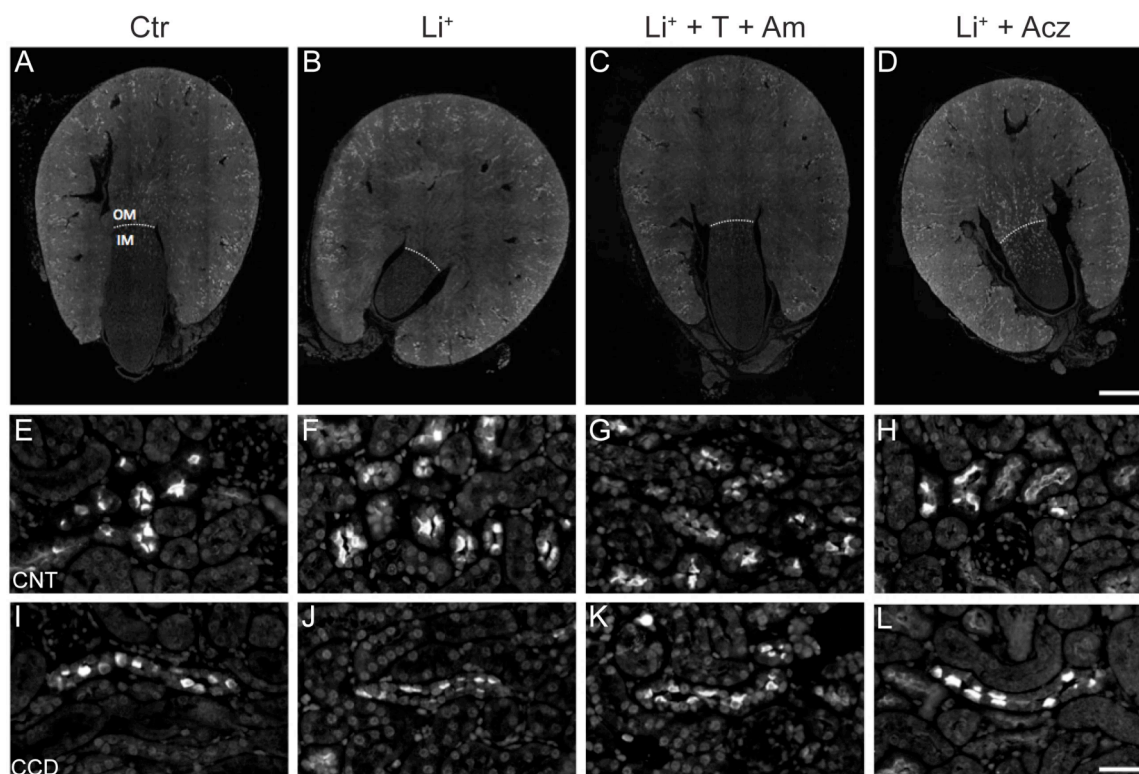

**Supplementary figure 2. Expression and distribution of  $H^+$ -ATPase in kidneys of lithium-NDI mice treated with thiazide/amiloride or ACZ.** Paraffin sections of immersion-fixed kidneys from control (Ctr; **A**, **E**, **I**), lithium-treated ( $Li^+$ ; **B**, **F**, **J**), lithium/amiloride/thiazide-treated ( $Li^+$  + T + Am; **C**, **G**, **K**), and lithium/ACZ-treated mice ( $Li^+$  + Acz; **D**, **H**, **L**) were incubated with a rabbit polyclonal  $H^+$ -ATPase antibody followed by a Cy3-coupled goat-anti rabbit IgG. Overviews (**A-D**) and high magnifications of representative connecting tubules (CNT; **E-H**), and cortical collecting ducts (CCD; **I-L**).
